# Supplementary material
Source: PubMed Central journal article supplement (PMC7903805)

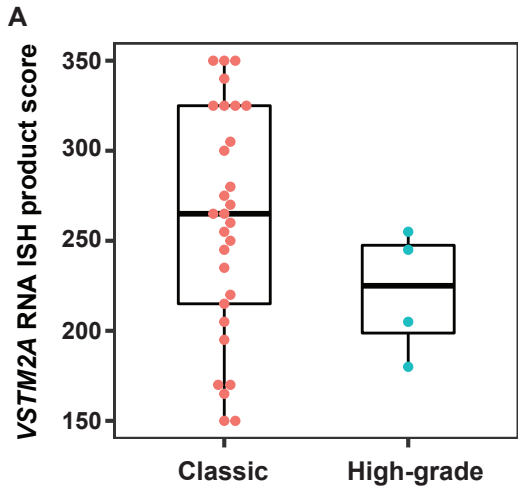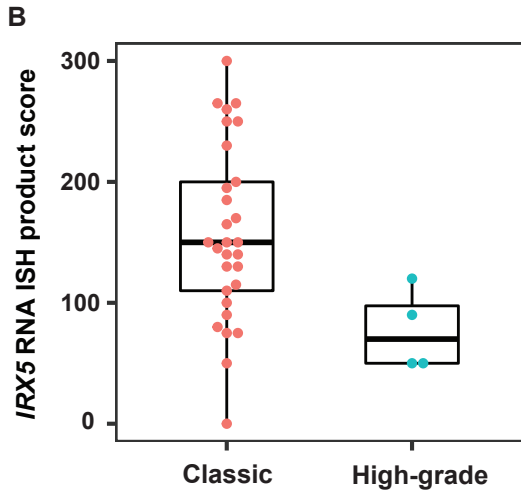

Supplement: NIHMS1628873-supplement-Supplemental_Data_File___doc___tif__pdf__etc___4.pdf [file NIHMS1628873-supplement-Supplemental_Data_File___doc___tif__pdf__etc___4.pdf]
